# Supplementary material for: Subtype C gp140 Vaccine Boosts Immune Responses Primed by the South African AIDS Vaccine Initiative DNA-C2 and MVA-C HIV Vaccines after More than a 2-Year Gap
Source: PubMed Central journal article supplement (PMC4895009; doi:10.1128/cvi.00717-15), 2016-06-06
Supplement: CVI.00717-15_zcd999095359so1.pdf [file CVI.00717-15_zcd999095359so1.pdf]

**Supplementary Table 1: The proportion of participants with vaccine induced T-cell responses to PTEG peptides at different timepoints**

| Time point                | Gag              |                | Pol            |                 | Env              |                 | Any Antigen      |                  |
|---------------------------|------------------|----------------|----------------|-----------------|------------------|-----------------|------------------|------------------|
|                           | CD4              | CD8            | CD4            | CD8             | CD4              | CD8             | CD4              | CD8              |
| <b>HVTN 073 T1</b>        |                  |                |                |                 |                  |                 |                  |                  |
| <b>MVA1</b>               | 13/32<br>(40.6%) | 1/36<br>(2.8%) | 3/32<br>(9.4%) | 3/36<br>(8.3%)  | 21/32<br>(65.6%) | 2/36<br>(5.6%)  | 22/32<br>(68.8%) | 6/36<br>(16.7%)  |
| <b>MVA2</b>               | 7/34<br>(20.6%)  | 2/37<br>(5.4%) | 2/34<br>(5.9%) | 9/37<br>(24.3%) | 24/34<br>(70.6%) | 4/37<br>(10.8%) | 25/34<br>(73.5%) | 12/37<br>(32.4%) |
| <b>HVTN 073E T1T2</b>     |                  |                |                |                 |                  |                 |                  |                  |
| <b>Extension baseline</b> | 1/15<br>(6.7%)   | 0/15           | 0/1            | 0/1             | 4/15<br>(26.7%)  | 1/15<br>(6.7%)  | 4/15<br>(26.7%)  | 1/15<br>(6.7%)   |
| <b>Protein1</b>           | 0/15             | 0/16           | -              | 0/1             | 13/15<br>(86.7%) | 1/16<br>(6.2%)  | 13/15<br>(86.7%) | 1/16<br>(6.3%)   |
| <b>Protein2</b>           | 1/13<br>(7.7%)   | 0/14           | 0/13           | 0/14            | 11/13<br>(84.6%) | 1/14<br>(7.1%)  | 11/13<br>(84.6%) | 1/14<br>(7.1%)   |
| <b>6 Months</b>           | 1/15<br>(6.7%)   | 0/15           | 0/15           | 0/15            | 11/15<br>(73.3%) | 0/15            | 11/15<br>(73.3%) | 0/15             |
| <b>HVTN 073E T1C2</b>     |                  |                |                |                 |                  |                 |                  |                  |
| <b>Extension baseline</b> | 0/6              | 0/6            | -              | -               | 1/6<br>(16.7%)   | 0/6             | 1/6 (16.7%)      | 0/6              |
| <b>Placebo1</b>           | 0/5              | 0/5            | -              | -               | 1/5<br>(20%)     | 0/5             | 1/5 (20%)        | 0/5              |
| <b>Placebo2</b>           | 0/6              | 0/6            | 0/6            | 0/6             | 1/6<br>(16.7%)   | 0/6             | 1/6 (16.7%)      | 0/6              |
| <b>6 Months</b>           | 0/6              | 0/6            | 0/6            | 1/6<br>(16.7%)  | 1/6<br>(16.7%)   | 0/6             | 1/6 (16.7%)      | 1/6<br>(16.7%)   |

No responses to Tat and only one response to nef CD4+ response with MVA1 in HVTN 073

**Supplementary Table 2: CD4+ and CD8+ T-cell responses, US and South Africa**

| T-cell | Antigen | Time point | Total            |           | USA             |           | RSA              |           | P*   |
|--------|---------|------------|------------------|-----------|-----------------|-----------|------------------|-----------|------|
|        |         |            | Response Rate    | 95% CI    | Response Rate   | 95% CI    | Response Rate    | 95% CI    |      |
| CD4    | Any     | MVA1       | 68.8%<br>(22/32) | 51.4,82.0 | 80.0%<br>(8/10) | 49.0,94.3 | 63.6%<br>(14/22) | 43.0,80.3 | 0.44 |
|        |         | MVA2       | 73.5%<br>(25/34) | 56.9,85.4 | 88.9%<br>(8/9)  | 56.5,98.0 | 68.0%<br>(17/25) | 48.4,82.8 | 0.39 |
|        | Env     | MVA1       | 65.6%<br>(21/32) | 48.3,79.6 | 70.0%<br>(7/10) | 39.7,89.2 | 63.6%<br>(14/22) | 43.0,80.3 | 1.00 |
|        |         | MVA2       | 70.6%<br>(24/34) | 53.8,83.2 | 77.8%<br>(7/9)  | 45.3,93.7 | 68.0%<br>(17/25) | 48.4,82.8 | 0.69 |
|        | Gag     | MVA1       | 40.6%<br>(13/32) | 25.5,57.7 | 60.0%<br>(6/10) | 31.3,83.2 | 31.8%<br>(7/22)  | 16.4,52.7 | 0.24 |
|        |         | MVA2       | 20.6%<br>(7/34)  | 10.3,36.8 | 33.3%<br>(3/9)  | 12.1,64.6 | 16.0%<br>(4/25)  | 6.4,34.7  | 0.35 |
|        | Pol     | MVA1       | 9.4%<br>(3/32)   | 3.2,24.2  | 0.0%<br>(0/10)  | 0.0,27.8  | 13.6%<br>(3/22)  | 4.7,33.3  | 0.53 |
|        |         | MVA2       | 5.9%<br>(2/34)   | 1.6,19.1  | 0.0%<br>(0/9)   | 0.0,29.9  | 8.0%<br>(2/25)   | 2.2,25.0  | 1.00 |
| CD8    | Any     | MVA1       | 16.7%<br>(6/36)  | 7.9,31.9  | 30.0%<br>(3/10) | 10.8,60.3 | 11.5%<br>(3/26)  | 4.0,29.0  | 0.32 |
|        |         | MVA2       | 32.4%<br>(12/37) | 19.6,48.5 | 44.4%<br>(4/9)  | 18.9,73.3 | 28.6%<br>(8/28)  | 15.3,47.1 | 0.43 |
|        | Env     | MVA1       | 5.6%<br>(2/36)   | 1.5,18.1  | 10.0%<br>(1/10) | 1.8,40.4  | 3.8%<br>(1/26)   | 0.7,18.9  | 0.48 |
|        |         | MVA2       | 10.8%<br>(4/37)  | 4.3,24.7  | 22.2%<br>(2/9)  | 6.3,54.7  | 7.1%<br>(2/28)   | 2.0,22.6  | 0.24 |
|        | Gag     | MVA1       | 2.8%<br>(1/36)   | 0.5,14.2  | 10.0%<br>(1/10) | 1.8,40.4  | 0.0%<br>(0/26)   | 0.0,12.9  | 0.28 |
|        |         | MVA2       | 5.4%<br>(2/37)   | 1.5,17.7  | 22.2%<br>(2/9)  | 6.3,54.7  | 0.0%<br>(0/28)   | 0.0,12.1  | 0.05 |
|        | Pol     | MVA1       | 8.3%<br>(3/36)   | 2.9,21.8  | 10.0%<br>(1/10) | 1.8,40.4  | 7.7%<br>(2/26)   | 2.1,24.1  | 1.00 |
|        |         | MVA2       | 24.3%<br>(9/37)  | 13.4,40.1 | 22.2%<br>(2/9)  | 6.3,54.7  | 25.0%<br>(7/28)  | 12.7,43.4 | 1.00 |

**Supplementary Table 3: Frequency of Binding Antibody Responses with the Binding Antibody Multiplex Assay, at Major Immunogenicity Timepoints**

| Antigen            | Treatment | Responders at Timepoint |                  | Treatment | Responders at Extension Timepoint |                      |                      |             |
|--------------------|-----------|-------------------------|------------------|-----------|-----------------------------------|----------------------|----------------------|-------------|
|                    |           | % ( response rate)      |                  |           | % ( response rate)                |                      |                      |             |
|                    |           | MVA 1 or placebo        | MVA 2 or placebo |           | Extension Baseline                | Protein 1 or placebo | Protein 2 or placebo | +6 months   |
| <b>Con S gp140</b> | T1        | 10 (1/10)               | 40.5 (15/37)     | T1/T2     | 0 (0/15)                          | 100 (15/15)          | 100 (15/15)          | 100 (16/16) |
|                    |           |                         |                  | T1/C2     | 16.7 (1/6)                        | 20(1/5)              | 16.7 (1/6)           | 16.7 (1/6)  |
|                    | C1        | 0 (0/1)                 | 0 (0/8)          |           |                                   |                      |                      |             |
| <b>gp41</b>        | T1        | 20 (2/10)               | 67.6 (25/37)     | T1/T2     | 0 (0/15)                          | 100 (15/15)          | 100 (15/15)          | 100 (16/16) |
|                    |           |                         |                  | T1/C2     | 0 (0/6)                           | 0 (0/5)              | 0 (0/6)              | 0 (0/6)     |
|                    | C1        | 0 (0/1)                 | 0 (0/8)          |           |                                   |                      |                      |             |
| <b>o-gpTV1ΔV2</b>  | T1        | ND                      | ND               | T1/T2     | 0 (0/15)                          | 100 (15/15)          | 100 (15/15)          | 100 (16/16) |
|                    |           |                         |                  | T1/C2     | 0 (0/6)                           | 0 (0/5)              | 0 (0/6)              | 0 (0/6)     |
|                    | C1        | ND                      | ND               |           |                                   |                      |                      |             |
| <b>p24</b>         | T1        | 10* (2/21)              | 41* (9/22)       | T1/T2     | 26.7 (4/15)                       | 33.3 (5/15)          | 20 (3/15)            | 18.8 (3/16) |
|                    |           |                         |                  | T1/C2     | 0 (0/6)                           | 0 (0/5)              | 0 (0/6)              | 0 (0/6)     |
|                    | C1        | 0* (0/5)                | 0* (0/5)         |           |                                   |                      |                      |             |
| <b>p55 Gag</b>     | T1        | 30 (3/10)               | 51.4 (19/37)     | T1/T2     | ND                                | ND                   | ND                   | ND          |
|                    |           |                         |                  | T1/C2     | ND                                | ND                   | ND                   | ND          |
|                    | C1        | 0 (0/1)                 | 0 (0/8)          |           |                                   |                      |                      |             |

\* This was assayed for the subset of participants who rolled over to extension. Treatment groups combined as  $T1 = T1/C2+T1/T2$  and  $C1 = C1/C2+C1/T2$

**Supplementary Table 4: Frequency of HIV-specific Neutralizing Antibody Responses in the TZM-bl Assay, at Major Immunogenicity Timepoints**

| Isolate               | Treatment | Responders at Timepoint |                     |                     | Treatment | Responders at Extension Timepoint |                         |                         |            |
|-----------------------|-----------|-------------------------|---------------------|---------------------|-----------|-----------------------------------|-------------------------|-------------------------|------------|
|                       |           | Baseline                | MVA 1 or<br>Placebo | MVA 2 or<br>Placebo |           | Extension<br>Baseline             | Protein 1 or<br>Placebo | Protein 2 or<br>Placebo | +6 months  |
|                       |           | % (response rate)       |                     |                     |           |                                   | % (response rate)       |                         |            |
| Tier 1                |           |                         |                     |                     |           |                                   |                         |                         |            |
| MW965.26<br>(Clade C) | T1        | 0 (0/29)                | 0 (0/32)            | 0 (0/37)            | T1/T2     | 6.3 (1/16)                        | 56.3 (9/16)             | 100 (15/15)             | 75 (12/16) |
|                       |           |                         |                     |                     | T1/C2     | 33.3 (2/6)                        | 20 (1/5)                | 0 (0/6)                 | 0 (0/6)    |
|                       | C1        | 0 (0/6)                 | 0 (0/6)             | 0 (0/8)             |           |                                   |                         |                         |            |
| MN*<br>(Clade B)      | T1        | 0 (0/29)                | 0 (0/32)            | 2.7 (1/37)          | T1/T2     | 0 (0/16)                          | 37.5 (6/16)             | 60 (9/15)               | 25 (4/16)  |
|                       |           |                         |                     |                     | T1/C2     | 0 (0/6)                           | 0 (0/5)                 | 0 (0/6)                 | 0 (0/6)    |
|                       | C1        | 0 (0/6)                 | 0 (0/6)             | 12.5 (1/8)          |           |                                   |                         |                         |            |
| SF162.LS<br>(Clade B) | T1        | ND                      | ND                  | 0 (0/9)             | T1/T2     | 6.3 (1/16)                        | 43.8 (7/16)             | 47 (7/15)               | 25 (4/16)  |
|                       |           |                         |                     |                     | T1/C2     | 0 (0/6)                           | 0 (0/5)                 | 0 (0/6)                 | 0 (0/6)    |
|                       | C1        | ND                      | ND                  | 0 (0/2)             |           |                                   |                         |                         |            |
| Tier 2                |           |                         |                     |                     |           |                                   |                         |                         |            |
| Du151.2<br>(Clade C)  | T1        | 3.4 (1/29)              | 0 (0/32)            | 2.7 (1/37)          | T1/T2     | 0 (0/16)                          | 0 (0/16)                | 6.7 (1/15)              | 0 (0/16)   |
|                       |           |                         |                     |                     | T1/C2     | 0 (0/6)                           | 0 (0/5)                 | 0 (0/6)                 | 0 (0/6)    |
|                       | C1        | 16.7 (1/6)              | 16.7 (1/6)          | 12.5 (1/8)          |           |                                   |                         |                         |            |

|           |    |    |    |    |       |          |          |          |          |
|-----------|----|----|----|----|-------|----------|----------|----------|----------|
| TV1.21    | T1 | ND | ND | ND | T1/T2 | 0 (0/16) | 0 (0/16) | 0 (0/15) | 0 (0/16) |
| (Clade C) |    |    |    |    | T1/C2 | 0 (0/6)  | 0 (0/5)  | 0 (0/6)  | 0 (0/6)  |
|           | C1 | ND | ND | ND |       |          |          |          |          |

\*MN/H9 was tested in the main study, while MN.3 was tested in the extension.

Primary Clade C Tier 2 isolates tested with no responses from T1 or C1: CAP210.2.00.E, CAP45.2.00.G3, Du156.12, Du172.17, Du422.1, ZM197M.PB7,

ZM109F.PB4, ZM135M.PL10a, ZM214M.PL15, ZM233M.PB6, ZM249M.PL1, and ZM53M.PB12.

Other Tier 2 isolates tested with no responses from T1 or C1: 92BR025.9, BZ167.12, BaL.26, Bx08.16, SS1196.1.

There were no responses in groups C1/C2 and C1/T2 across visits for all isolates.
